# Supplementary material for: A multifunctional magnetic core–shell fibrous silica sensing probe for highly sensitive detection and removal of Zn2+ from aqueous solution
Source: Royal Society of Chemistry journal article supplement (doi:10.1039/c5tc00166h), 2015-01-01
Supplement: c5tc00166h1.pdf [file c5tc00166h1.pdf]

## Supplementary Material

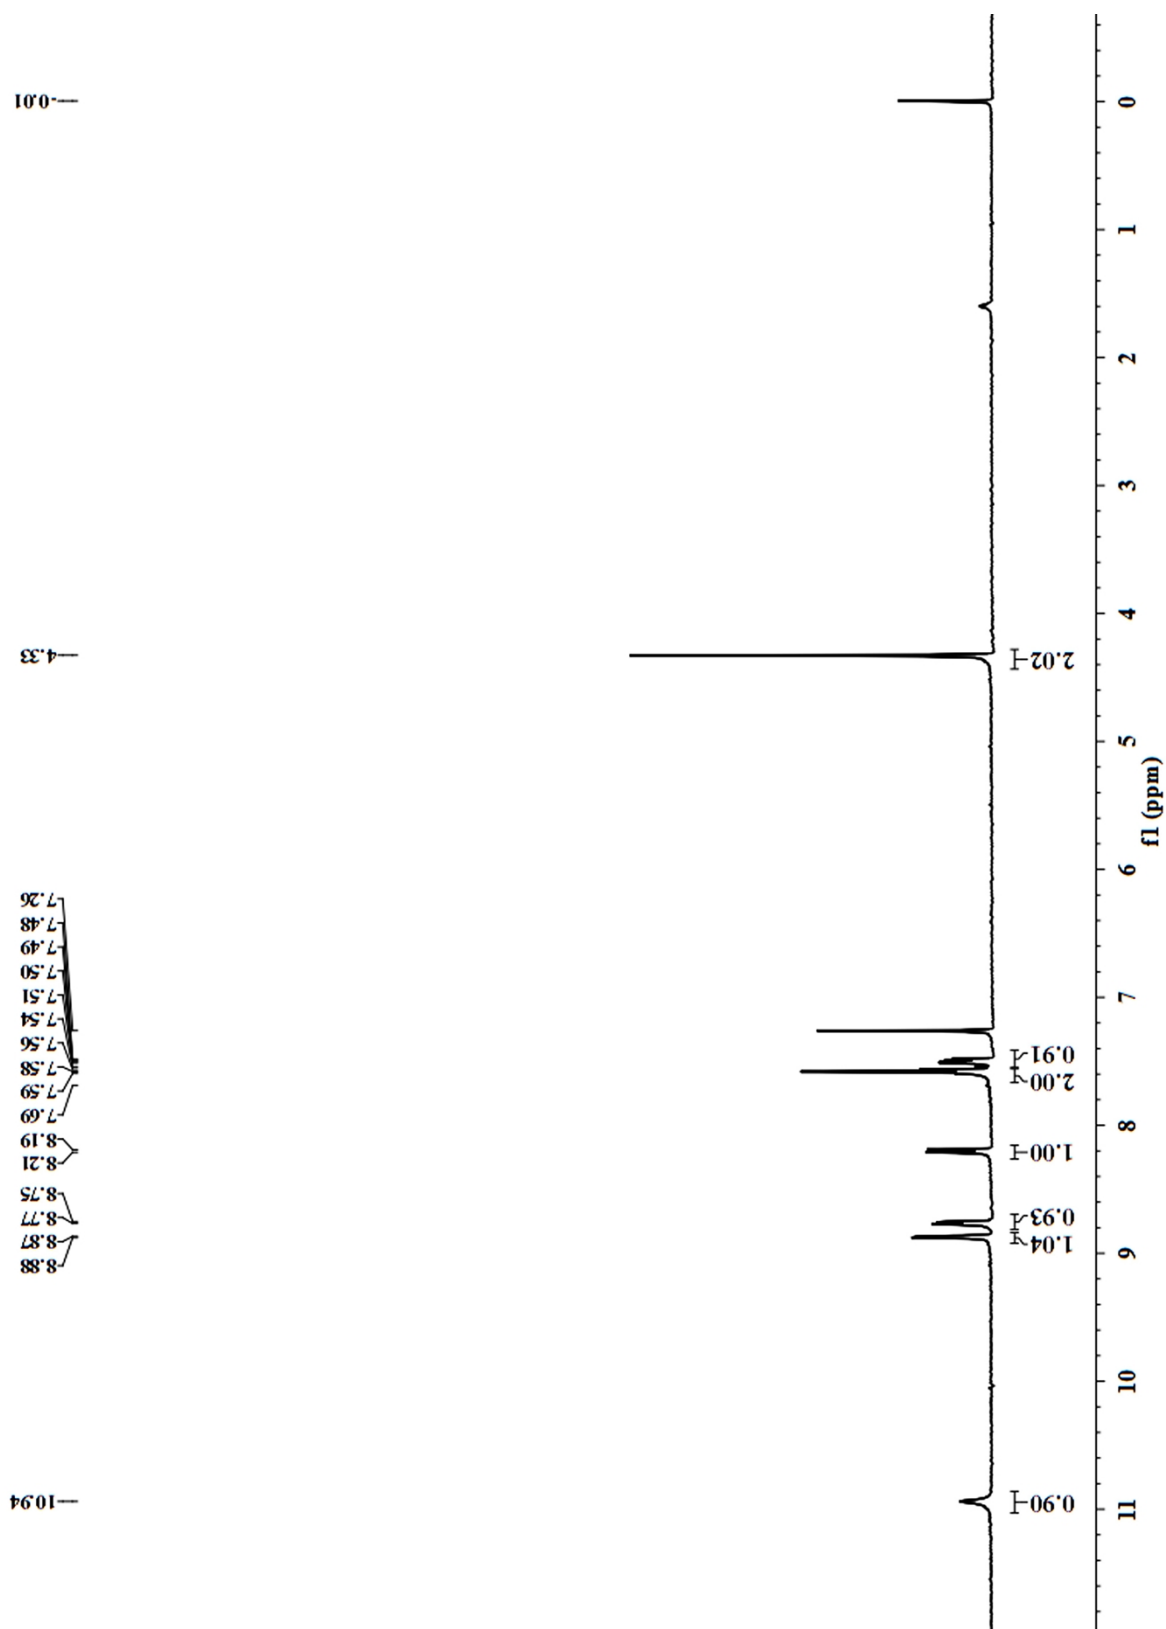

Fig. S1  $^1\text{H}$  NMR ( $\text{CDCl}_3$ , 400 MHz) spectrum of AQ-Cl.

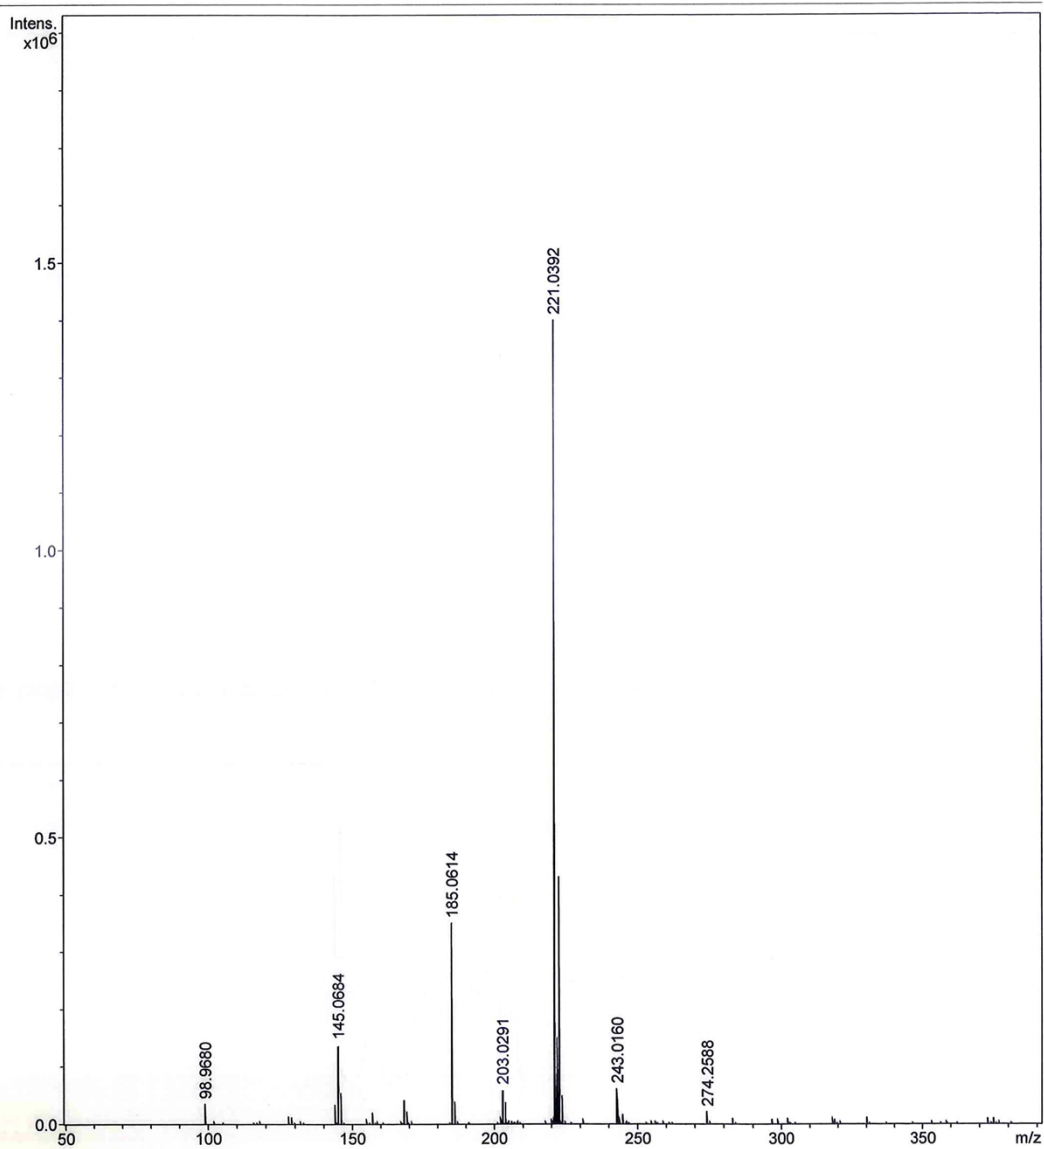

**Fig. S2** ESI-MS spectrum of AQ-Cl.

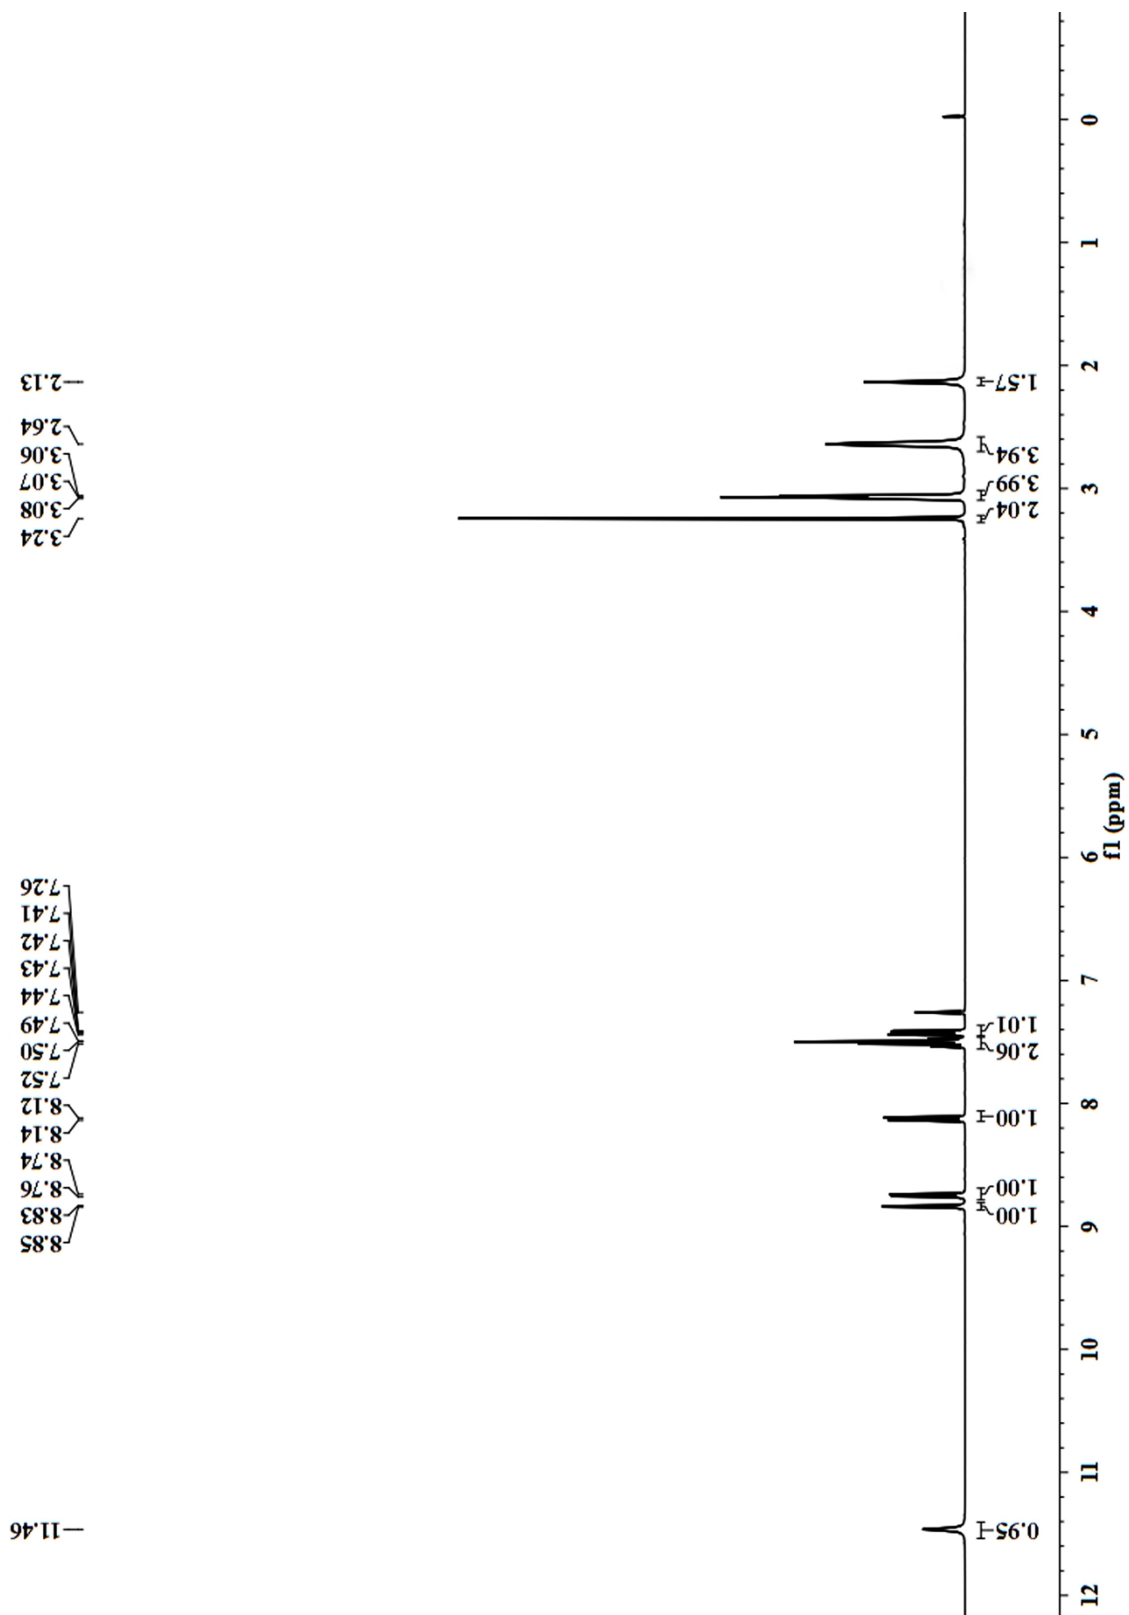

Fig. S3  $^1\text{H}$  NMR ( $\text{CDCl}_3$ , 400 MHz) spectrum of AQ-N.

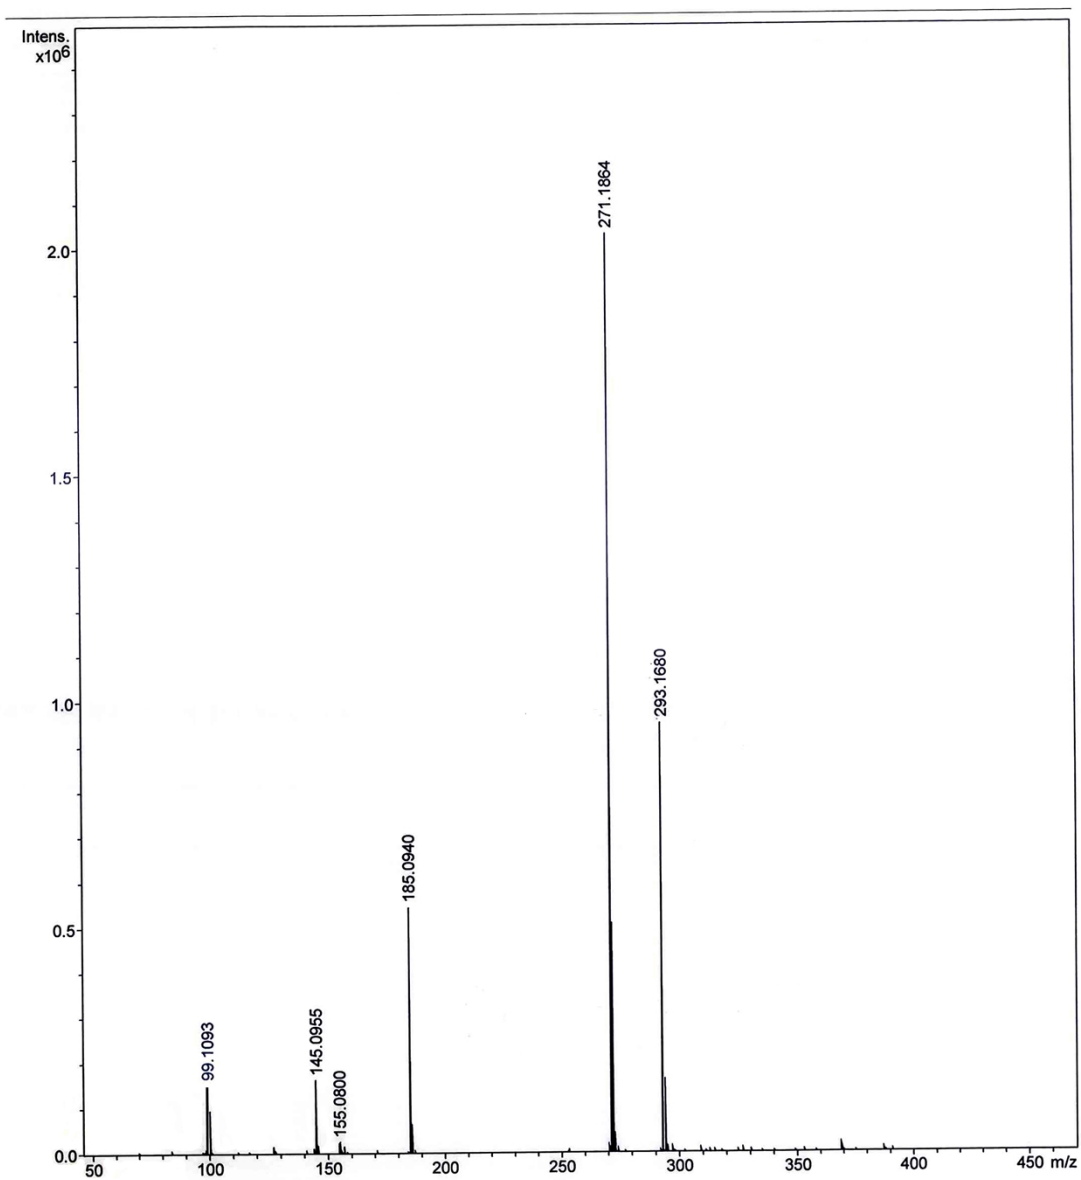

**Fig. S4** ESI-MS spectrum of AQ-N.



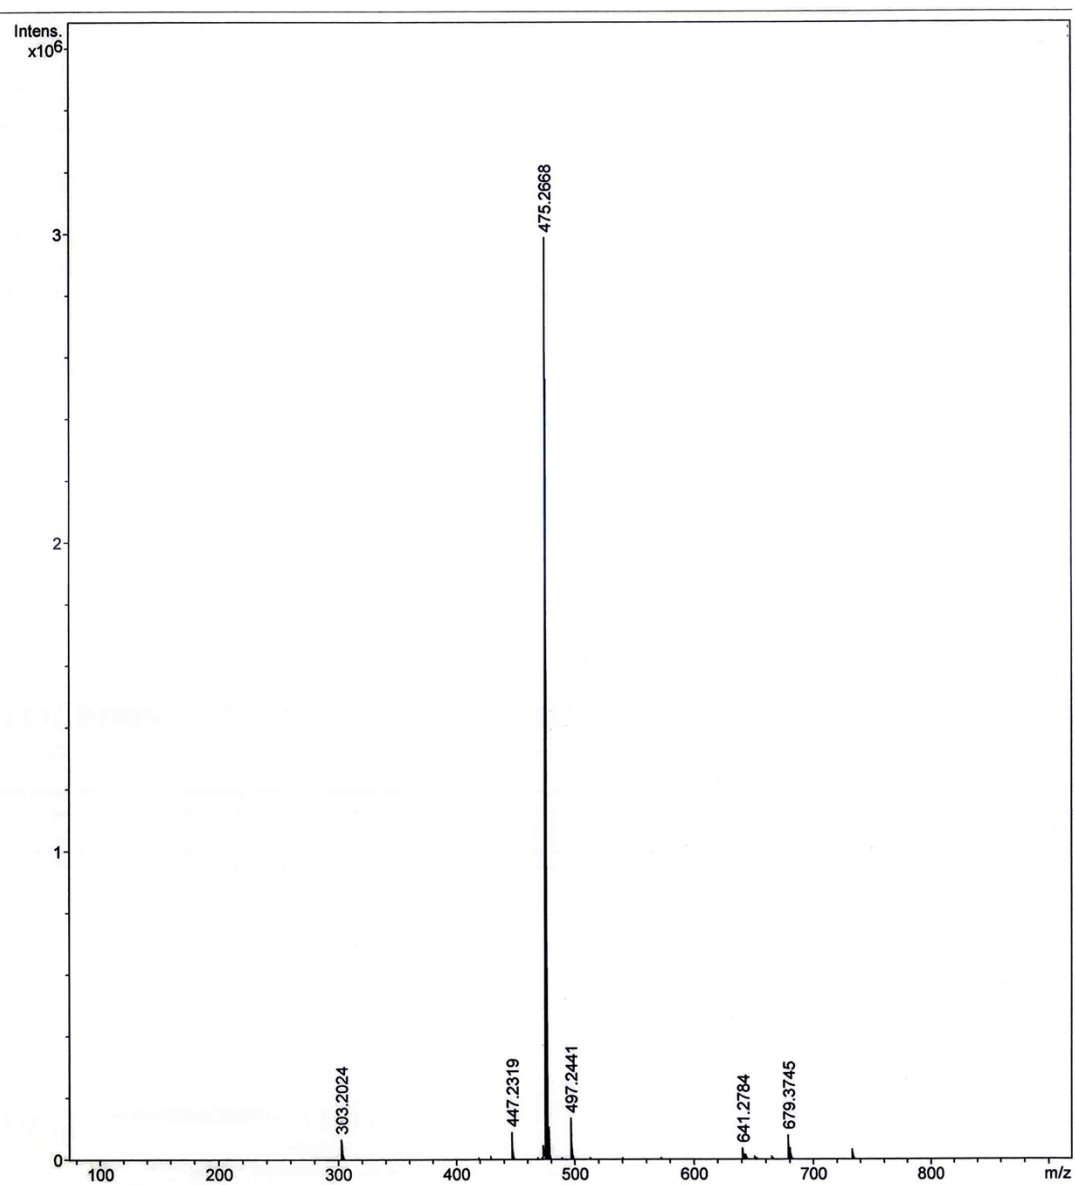

**Fig. S6** ESI-MS spectrum of AQ-Si.

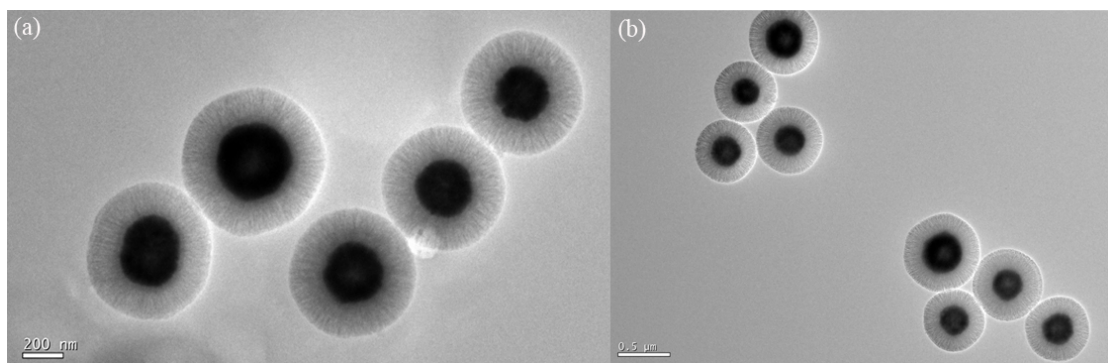

**Fig. S7.** Transmission electron microscopy images of AQ-Fe<sub>3</sub>O<sub>4</sub>@SiO<sub>2</sub>@KCC-1 (a) and (b).



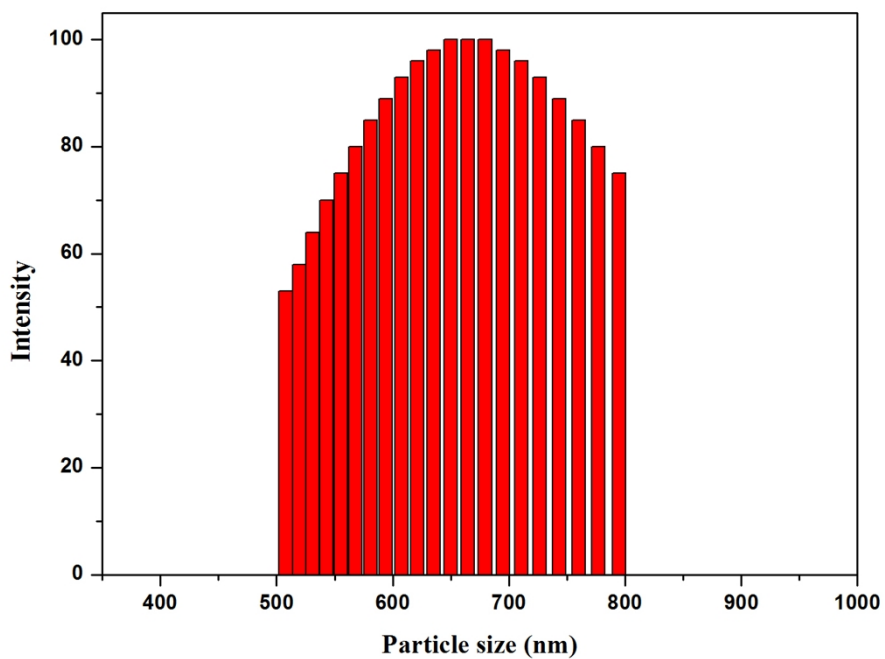

**Fig. S8** The particle size histogram from DLS of AQ-Fe<sub>3</sub>O<sub>4</sub>@SiO<sub>2</sub>@KCC-1.

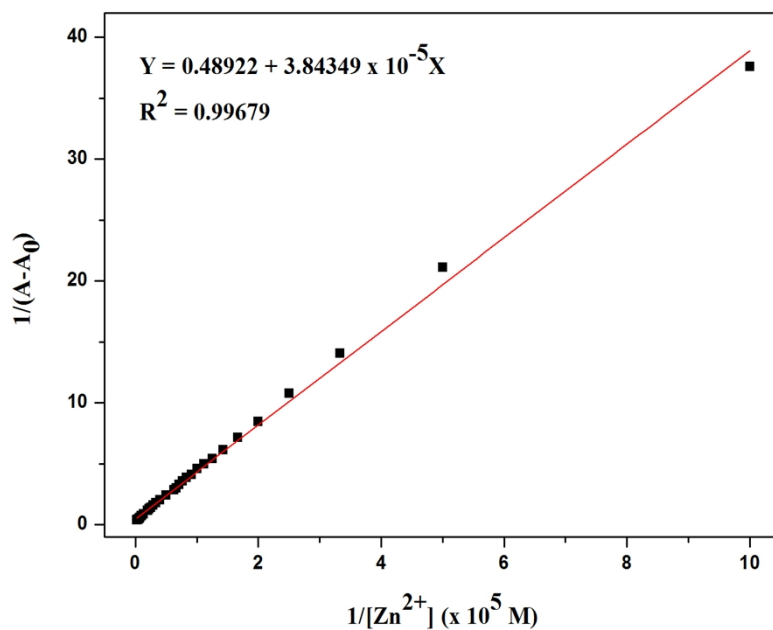

**Fig.S9** Benesi-Hildebrand plot (absorbance at 217 nm) of **AQ-Fe<sub>3</sub>O<sub>4</sub>@SiO<sub>2</sub>@KCC-1** assuming 1:1 stoichiometry between **AQ-Fe<sub>3</sub>O<sub>4</sub>@SiO<sub>2</sub>@KCC-1** and Zn<sup>2+</sup>.

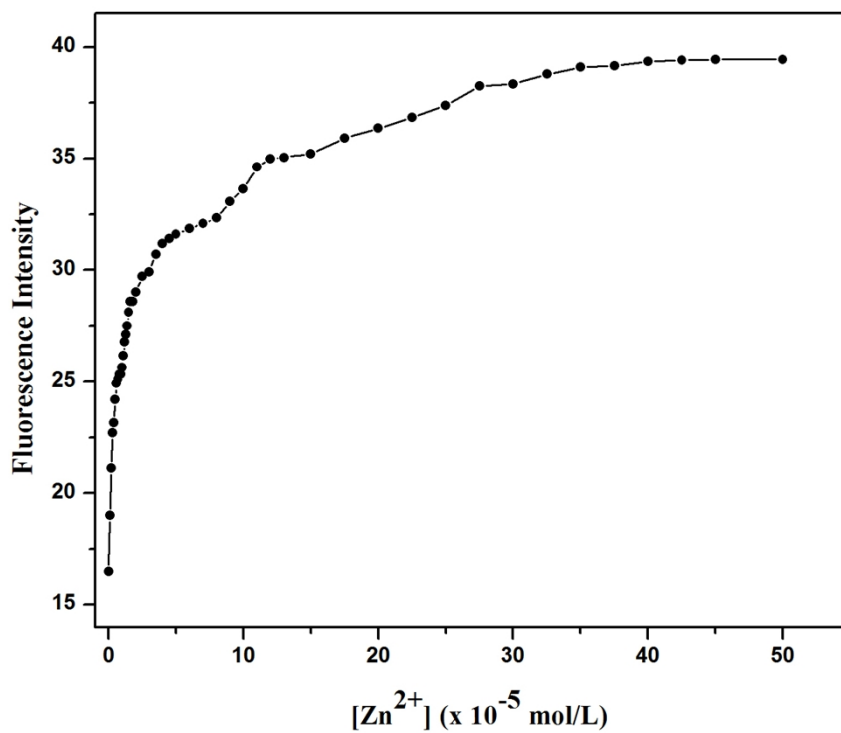

**Fig. S10** Fluorescence intensity at 509 nm of AQ-Fe<sub>3</sub>O<sub>4</sub>@SiO<sub>2</sub>@KCC-1 (0.1 mg/mL) in Tris-HCl solution (10 mM, pH = 7.20) as a function of Zn<sup>2+</sup> concentration (0-5.0 x 10<sup>-4</sup> M). Excitation at 360 nm.

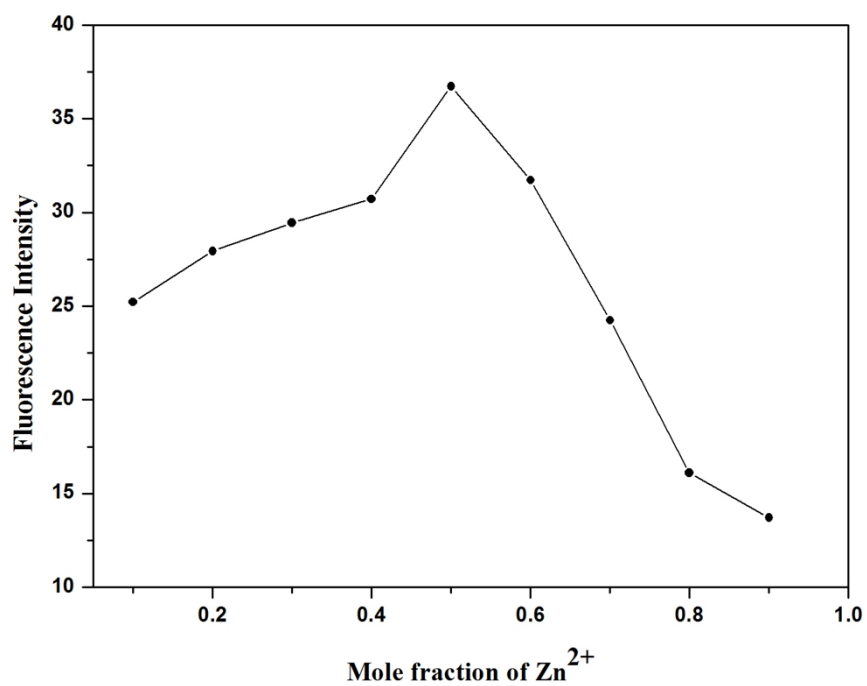

**Fig. S11** Job's plot for determining the stoichiometry of **AQ-Fe<sub>3</sub>O<sub>4</sub>@SiO<sub>2</sub>@KCC-1** and Zn<sup>2+</sup> ions. (The total concentration of **AQ-Fe<sub>3</sub>O<sub>4</sub>@SiO<sub>2</sub>@KCC-1** and Zn<sup>2+</sup> ions was  $4 \times 10^{-5}$  M)  $\lambda_{\text{ex}} = 360$  nm and  $\lambda_{\text{em}} = 509$  nm.

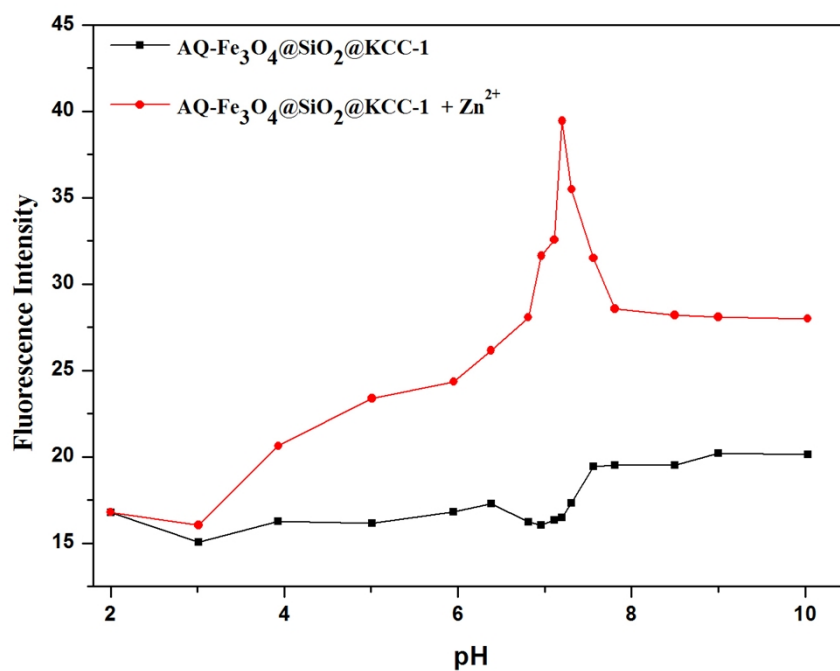

**Fig. S12** Variation of fluorescence intensity at 509 nm of **AQ-Fe<sub>3</sub>O<sub>4</sub>@SiO<sub>2</sub>@KCC-1** (0.1 mg/mL) in Tris-HCl solution (10 mM, pH = 7.20) with and without  $3.1 \times 10^{-5}$  M  $Zn^{2+}$  as a function of pH. Excitation at 360 nm.

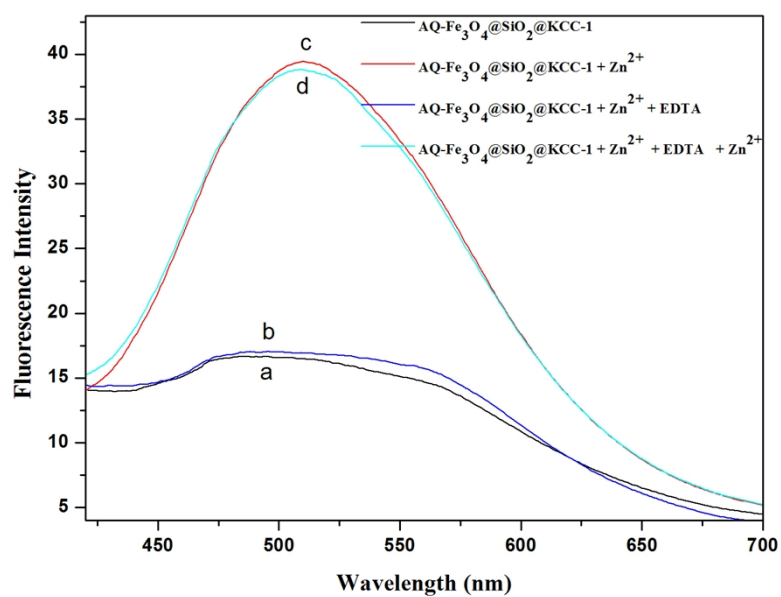

**Fig. S13.** Fluorescence spectra of AQ-Fe<sub>3</sub>O<sub>4</sub>@SiO<sub>2</sub>@KCC-1 (0.1 mg/mL) in Tris-HCl solution (10 mM, pH = 7.20) a) without, and b) with Zn<sup>2+</sup> (5.0 x 10<sup>-4</sup> M). c) treatment with EDTA (5.0 x 10<sup>-4</sup> M), d) again treatment with Zn<sup>2+</sup> (5.0 x 10<sup>-4</sup> M) in Tris-HCl solution (10 mM, pH = 7.20). Excitation at 360 nm.

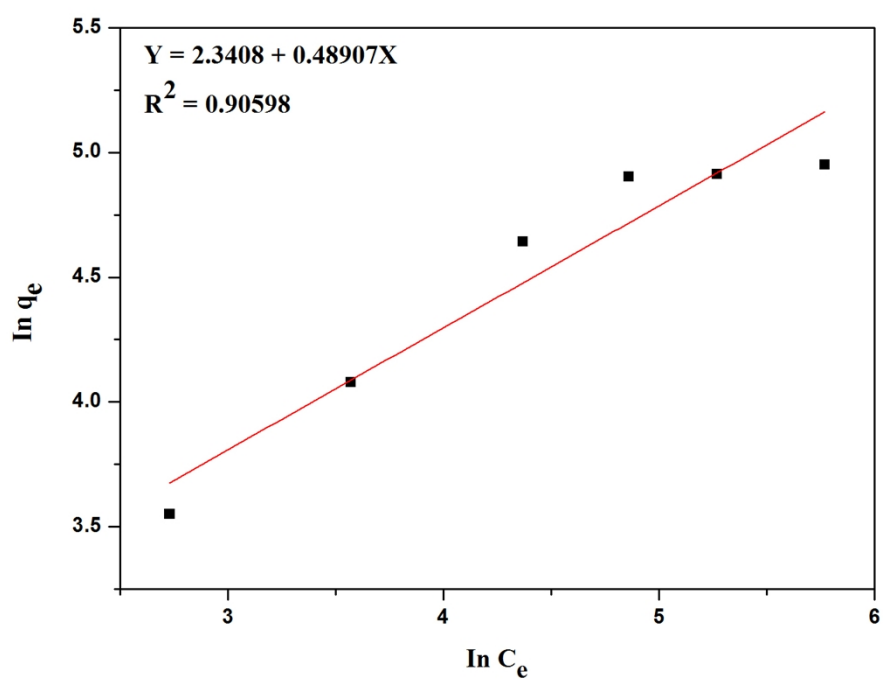

**Fig. S14** Freundlich adsorption isotherm plots for  $Zn^{2+}$  adsorption onto AQ- $Fe_3O_4@SiO_2@KCC-1$ .

**Table S1.** Structural properties of Fe<sub>3</sub>O<sub>4</sub>@SiO<sub>2</sub>@KCC-1 and AQ-Fe<sub>3</sub>O<sub>4</sub>@SiO<sub>2</sub>@KCC-1

| Samples                                                    | S <sub>BET</sub> (m <sup>2</sup> /g) <sup>a</sup> | D <sub>BJH</sub> (nm) <sup>b</sup> | V <sub>t</sub> (cm <sup>3</sup> /g) <sup>c</sup> |
|------------------------------------------------------------|---------------------------------------------------|------------------------------------|--------------------------------------------------|
| Fe <sub>3</sub> O <sub>4</sub> @SiO <sub>2</sub> @KCC-1    | 213.07                                            | 7.94                               | 0.41                                             |
| AQ-Fe <sub>3</sub> O <sub>4</sub> @SiO <sub>2</sub> @KCC-1 | 78.76                                             | 7.20                               | 0.15                                             |

<sup>a</sup>S<sub>BET</sub> : BET surface area calculated from data at P/P<sub>0</sub> = 0.06-0.29. <sup>b</sup>D<sub>BJH</sub> : the maximum of the Barret-Joyner-Hellenda (BJH) pore size distribution calculated from the desorption branch of the nitrogen isotherm. <sup>c</sup>V<sub>t</sub> : total pore volume calculated at P/P<sub>0</sub> at 0.99.



**Table S2.** Elementary analysis of **AQ-Fe<sub>3</sub>O<sub>4</sub>@SiO<sub>2</sub>@KCC-1**

| N (%) | C (%) | H (%) |
|-------|-------|-------|
| 1.73  | 8.77  | 1.032 |

**Table S3.** The parameters of Langmuir and Freundlich isotherms for Zn<sup>2+</sup> adsorption onto AQ-Fe<sub>3</sub>O<sub>4</sub>@SiO<sub>2</sub>@KCC-1.

| Adsorption isotherm | parameter                            | AQ-Fe <sub>3</sub> O <sub>4</sub> @SiO <sub>2</sub> @KCC-1 |                |
|---------------------|--------------------------------------|------------------------------------------------------------|----------------|
|                     |                                      | Value of parameter                                         | R <sup>2</sup> |
| Langmuir            | K <sub>L</sub> (L mg <sup>-1</sup> ) | 0.02896                                                    | 0.96566        |
|                     | q <sub>m</sub> (mg g <sup>-1</sup> ) | 157.2327                                                   |                |
| Freundlich          | K <sub>F</sub> (L g <sup>-1</sup> )  | 10.39                                                      | 0.90598        |
|                     | n                                    | 2.04                                                       |                |
